# Supplementary material for: Syntheses, crystal structures, and magnetic properties of cyclic dimer Ln2L2 complexes constructed from (3-pyridinylmethoxy)phenyl-substituted nitronyl nitroxide ligands
Source: Royal Society of Chemistry journal article supplement (doi:10.1039/c7ra06310e), 2017-01-01
Supplement: c7ra06310e1.pdf [file c7ra06310e1.pdf]

# Syntheses, crystal structures, and magnetic properties of cyclic dimer Ln<sub>2</sub>L<sub>2</sub> complexes constructed from (3-pyridinylmethoxy)phenyl-substituted nitronyl nitroxide ligands

Mei Zhu,<sup>\*a</sup>Yang Li<sup>a</sup>, Lingjie Jia<sup>a</sup>, Li Zhang<sup>a</sup>, Wei Zhang<sup>a</sup>

<sup>a</sup>Department of Chemistry, Zhejiang Sci-Tech University, Hangzhou 310018, China

**Table S1** Selected bond lengths (Å) and angles (°) for complex **1**

|                 |            |                 |            |
|-----------------|------------|-----------------|------------|
| Gd(1)-O(7)      | 2.320(5)   | Gd(1)-O(1)      | 2.376(5)   |
| Gd(1)-O(5)      | 2.356(4)   | Gd(1)-O(6)      | 2.387(4)   |
| Gd(1)-O(2)      | 2.357(5)   | Gd(1)-N(1)      | 2.579(5)   |
| Gd(1)-O(4)      | 2.362(4)   | O(7)-N(2)       | 1.315(7)   |
| Gd(1)-O(3)      | 2.364(4)   |                 |            |
| N(2)-O(7)-Gd(1) | 139.2(4)   | O(4)-Gd(1)-N(1) | 74.86(17)  |
| O(7)-Gd(1)-N(1) | 71.91(17)  | O(3)-Gd(1)-N(1) | 142.08(16) |
| O(5)-Gd(1)-N(1) | 77.80(16)  | O(1)-Gd(1)-N(1) | 71.27(17)  |
| O(2)-Gd(1)-N(1) | 138.28(17) | O(6)-Gd(1)-N(1) | 126.74(17) |

**Table S2** Selected bond lengths (Å) and angles (°) for complex **2**

|                   |           |                   |          |
|-------------------|-----------|-------------------|----------|
| Tb(1)-O(7)        | 2.317(6)  | Tb(1)-O(4)        | 2.368(6) |
| Tb(1)-O(5)        | 2.336(5)  | Tb(1)-O(6)        | 2.376(5) |
| Tb(1)-O(2)        | 2.344(5)  | Tb(1)-N(1)#1      | 2.585(6) |
| Tb(1)-O(3)        | 2.350(6)  | O(7)-N(3)         | 1.323(8) |
| Tb(1)-O(1)        | 2.351(6)  |                   |          |
| N(3)-O(7)-Tb(1)   | 139.8(5)  | O(3)-Tb(1)-N(1)#1 | 72.0(2)  |
| O(7)-Tb(1)-N(1)#1 | 72.0(2)   | O(1)-Tb(1)-N(1)#1 | 74.7(2)  |
| O(5)-Tb(1)-N(1)#1 | 77.73(19) | O(4)-Tb(1)-N(1)#1 | 138.9(2) |
| O(2)-Tb(1)-N(1)#1 | 142.4(2)  | O(6)-Tb(1)-N(1)#1 | 126.7(2) |

Symmetry transformations used to generate equivalent atoms: #1 -x+2,-y,-z+1

**Table S3** Selected bond lengths (Å) and angles (°) for complex **3**

|                 |            |                 |            |
|-----------------|------------|-----------------|------------|
| Dy(1)-O(8)      | 2.294(5)   | Dy(1)-O(4)      | 2.347(5)   |
| Dy(1)-O(1)      | 2.323(4)   | Dy(1)-O(2)      | 2.362(4)   |
| Dy(1)-O(5)      | 2.332(5)   | Dy(1)-N(3)      | 2.560(5)   |
| Dy(1)-O(3)      | 2.336(5)   | O(8)-N(2)       | 1.313(7)   |
| Dy(1)-O(6)      | 2.340(4)   |                 |            |
| O(8)-Dy(1)-N(3) | 71.74(17)  | O(6)-Dy(1)-N(3) | 142.02(17) |
| O(1)-Dy(1)-N(3) | 77.64(16)  | O(4)-Dy(1)-N(3) | 71.34(17)  |
| O(5)-Dy(1)-N(3) | 74.61(17)  | O(2)-Dy(1)-N(3) | 126.64(18) |
| O(3)-Dy(1)-N(3) | 138.69(18) | N(2)-O(8)-Dy(1) | 139.4(4)   |

**Table S4** Selected bond lengths (Å) and angles (°) for complex **4**

|                 |            |                   |           |
|-----------------|------------|-------------------|-----------|
| Ho(1)-O(8)#1    | 2.282(4)   | Ho(1)-O(6)        | 2.338(4)  |
| Ho(1)-O(1)      | 2.313(4)   | Ho(1)-O(2)        | 2.349(4)  |
| Ho(1)-O(4)      | 2.313(4)   | Ho(1)-N(1)        | 2.547(5)  |
| Ho(1)-O(3)      | 2.326(4)   | O(8)-N(2)         | 1.314(7)  |
| Ho(1)-O(5)      | 2.328(5)   |                   |           |
| O(3)-Ho(1)-N(1) | 142.23(16) | N(2)-O(8)-Ho(1)#1 | 139.3(4)  |
| O(5)-Ho(1)-N(1) | 138.68(17) | O(8)#1-Ho(1)-N(1) | 71.74(16) |
| O(6)-Ho(1)-N(1) | 71.26(16)  | O(1)-Ho(1)-N(1)   | 77.43(15) |
| O(2)-Ho(1)-N(1) | 126.72(16) | O(4)-Ho(1)-N(1)   | 74.48(16) |

Symmetry transformations used to generate equivalent atoms: #1 -x+1,-y+1,-z

**Table S5** Selected bond lengths (Å) and angles (°) for complex **5**

|                   |            |                   |            |
|-------------------|------------|-------------------|------------|
| Er(1)-O(7)        | 2.281(5)   | Er(1)-O(2)        | 2.331(5)   |
| Er(1)-O(5)        | 2.307(4)   | Er(1)-O(6)        | 2.345(5)   |
| Er(1)-O(3)        | 2.316(5)   | Er(1)-N(3)#1      | 2.534(6)   |
| Er(1)-O(1)        | 2.319(5)   | O(7)-N(1)         | 1.311(7)   |
| Er(1)-O(4)        | 2.320(5)   |                   |            |
| O(7)-Er(1)-N(3)#1 | 71.75(18)  | O(4)-Er(1)-N(3)#1 | 142.21(18) |
| O(5)-Er(1)-N(3)#1 | 77.47(17)  | O(2)-Er(1)-N(3)#1 | 71.26(18)  |
| O(3)-Er(1)-N(3)#1 | 74.37(18)  | O(6)-Er(1)-N(3)#1 | 126.94(18) |
| O(1)-Er(1)-N(3)#1 | 138.92(19) | N(1)-O(7)-Er(1)   | 138.8(4)   |

Symmetry transformations used to generate equivalent atoms: #1 -x+1,-y+1,-z

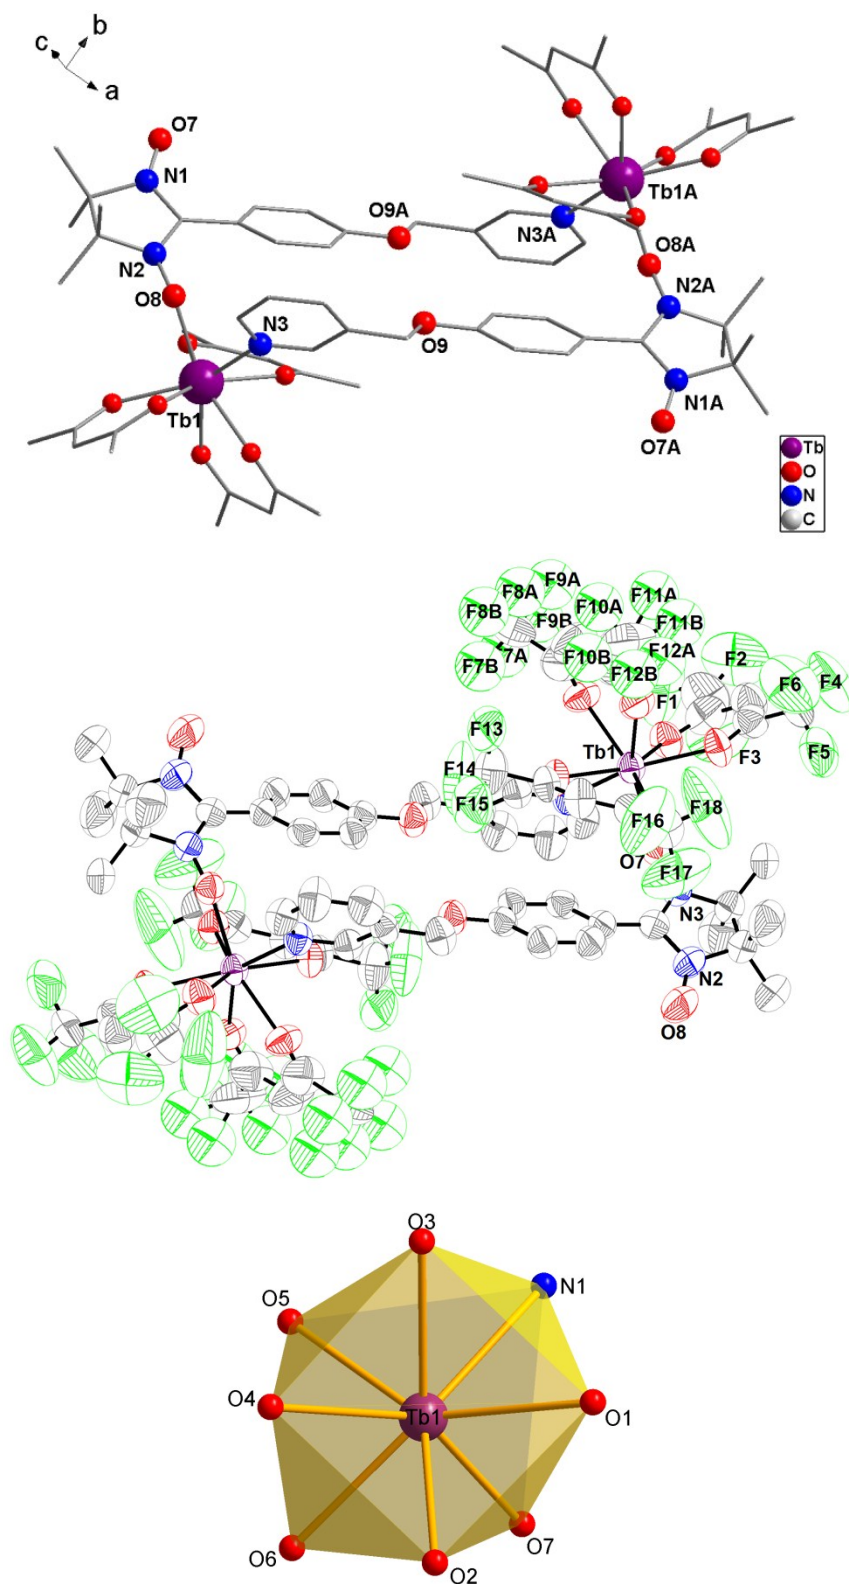

**Figure S1.** (top) Crystal structure of complex **2** (H atoms and F atoms are omitted for clarity and symmetry transformations used to generate equivalent atoms A:  $-x+2, -y, -z+1$ ); (middle) ORTEP view of complex **2** at the 50% probability level. (bottom) The coordination polyhedron of Tb(III) ion in **2**.

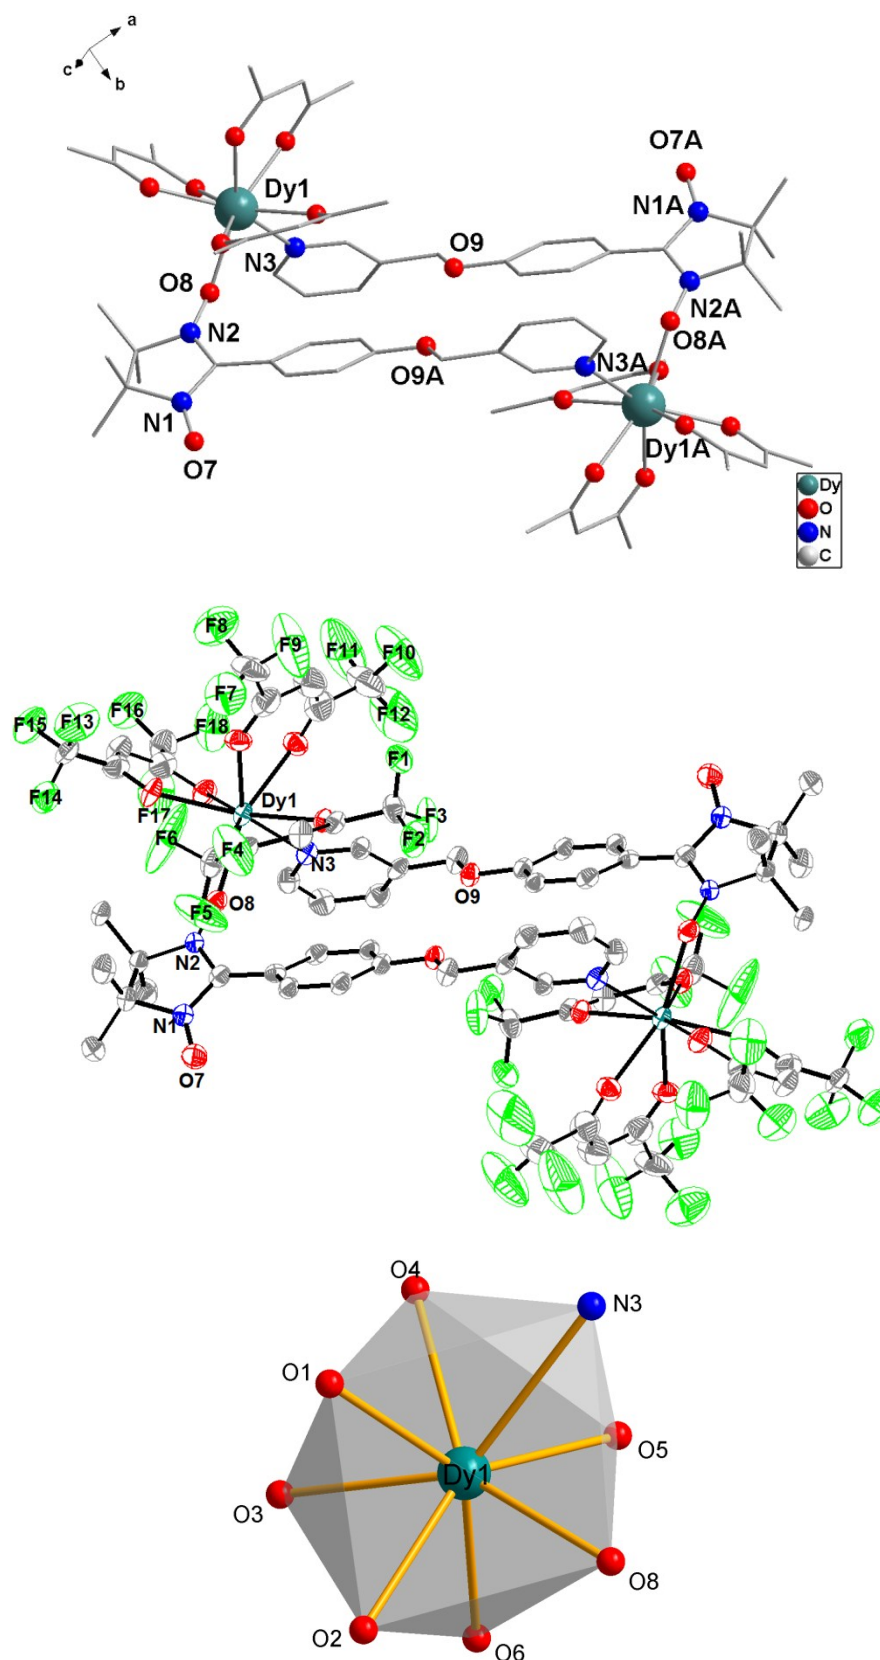

**Figure S2.**(top) Crystal structure of complex **3** (H atoms and F atoms are omitted for clarity and symmetry transformations used to generate equivalent atoms A:  $-x+1, -y+1, -z+1$ ); (middle) ORTEP view of complex **3** at the 50% probability level. (bottom) The coordination polyhedron of Dy(III) ion in **3**.

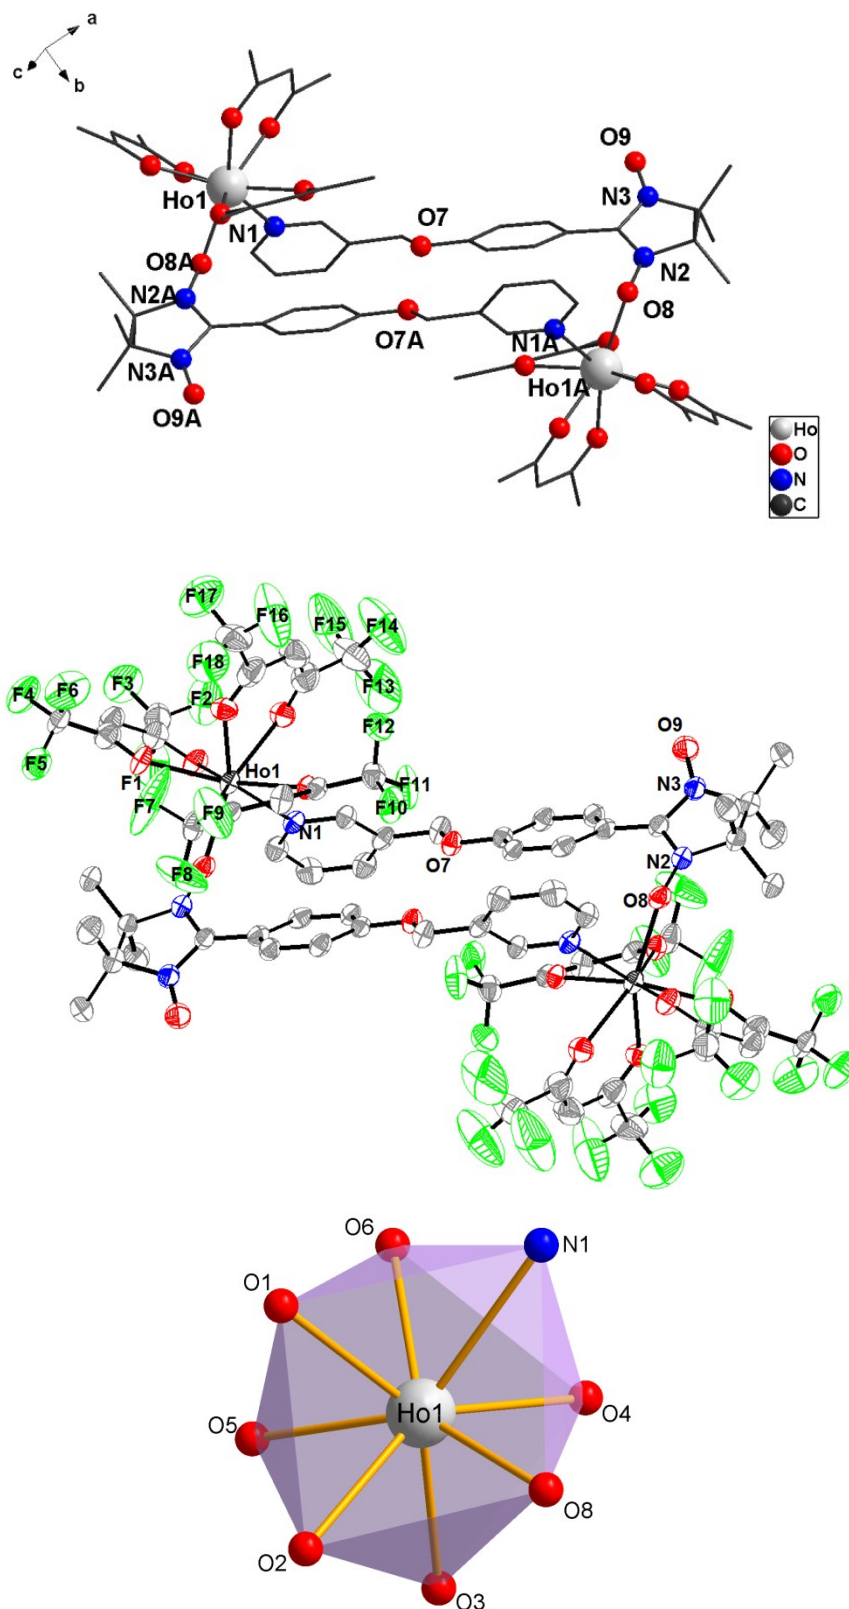

**Figure S3.** (top) Crystal structure of complex 4 (H atoms and F atoms are omitted for clarity and symmetry transformations used to generate equivalent atoms A:  $-x+1, -y+1, -z$ ); (middle) ORTEP view of complex 4 at the 50% probability level. (bottom) The coordination polyhedron of Ho(III) ion in 4.

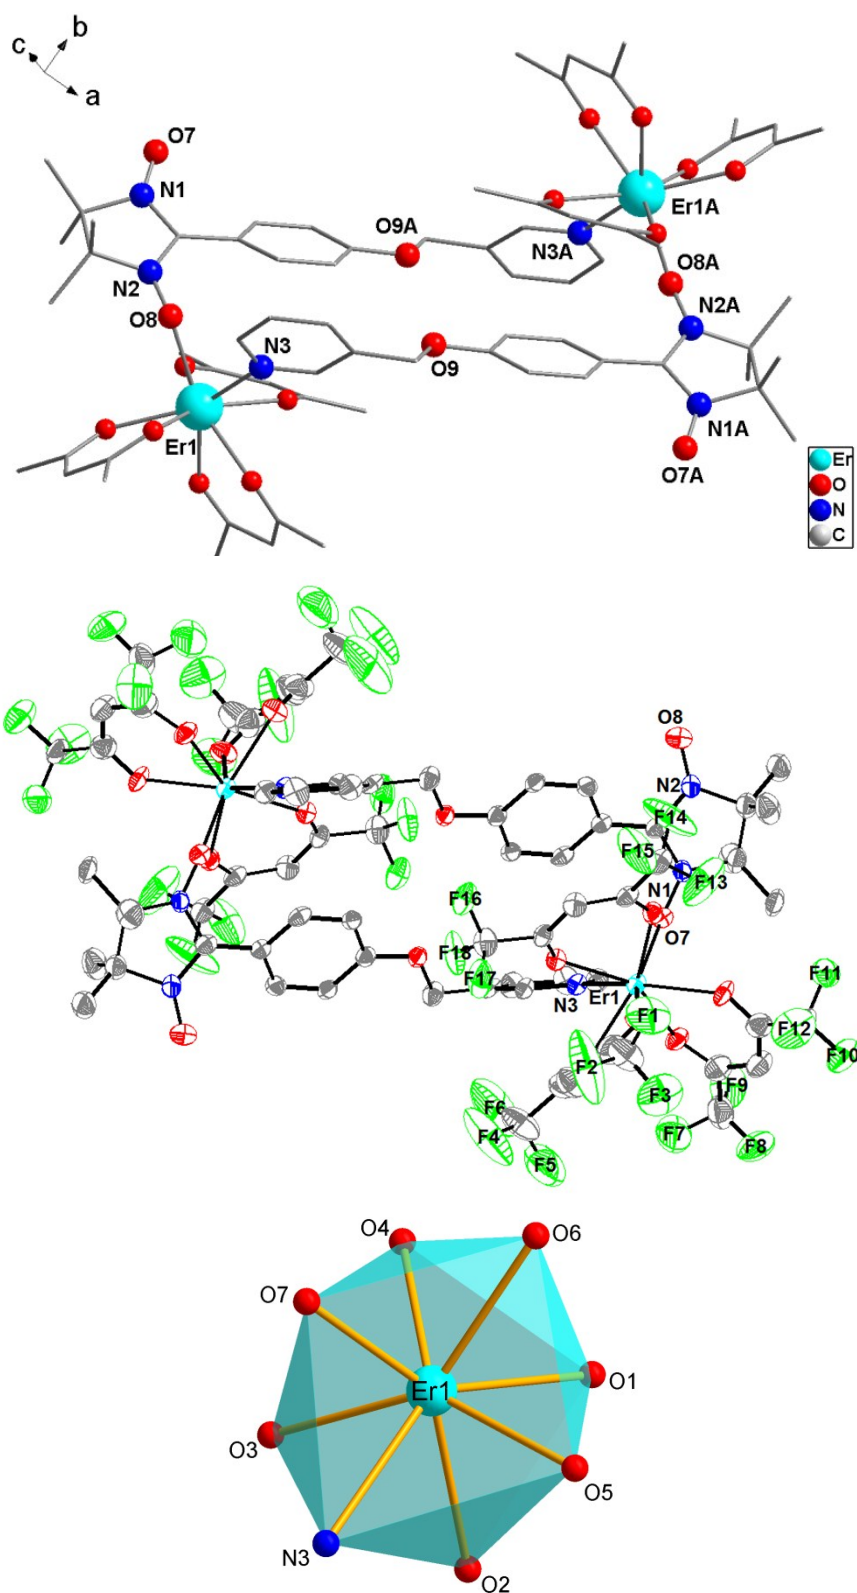

**Figure S4.** (top) Crystal structure of complex **5** (H atoms and F atoms are omitted for clarity and symmetry transformations used to generate equivalent atoms A:  $-x+1, -y+1, -z$ ); (middle) ORTEP view of complex **5** at the 50% probability level. (bottom) The coordination polyhedron of Er(III) ion in **5**.



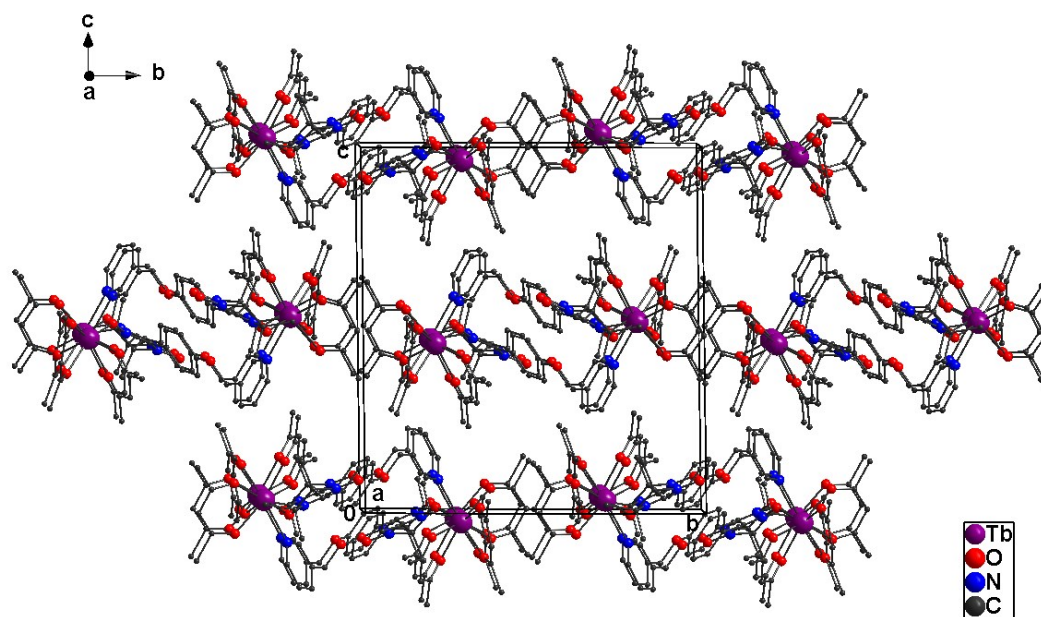

**Figure S5.** Packing diagram of complex **2**, hydrogen and fluorin atoms are not shown for the sake of clarity.

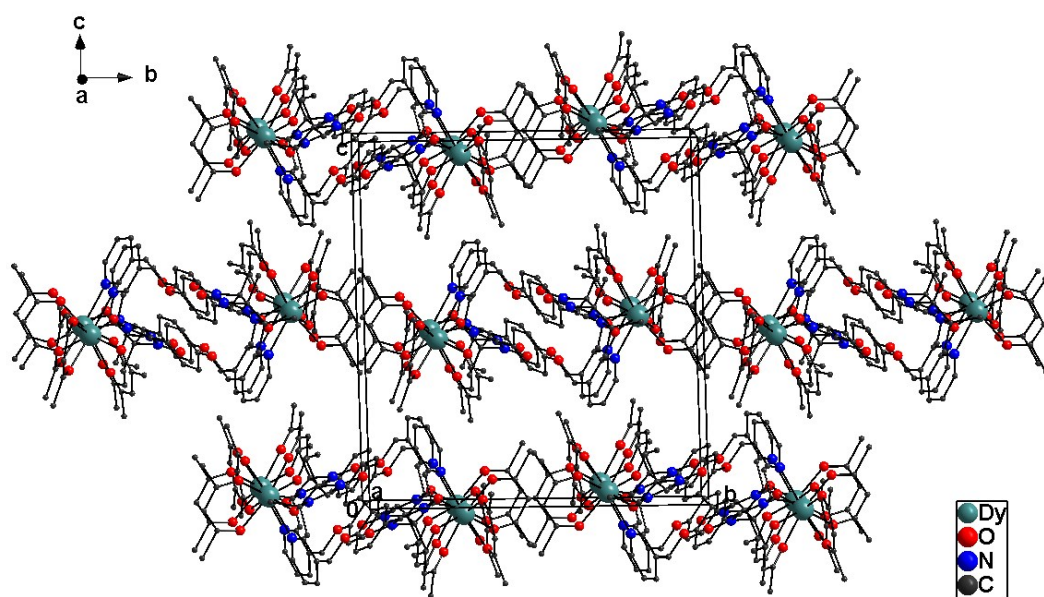

**Figure S6.** Packing diagram of complex **3**, hydrogen and fluorin atoms are not shown for the sake of clarity.

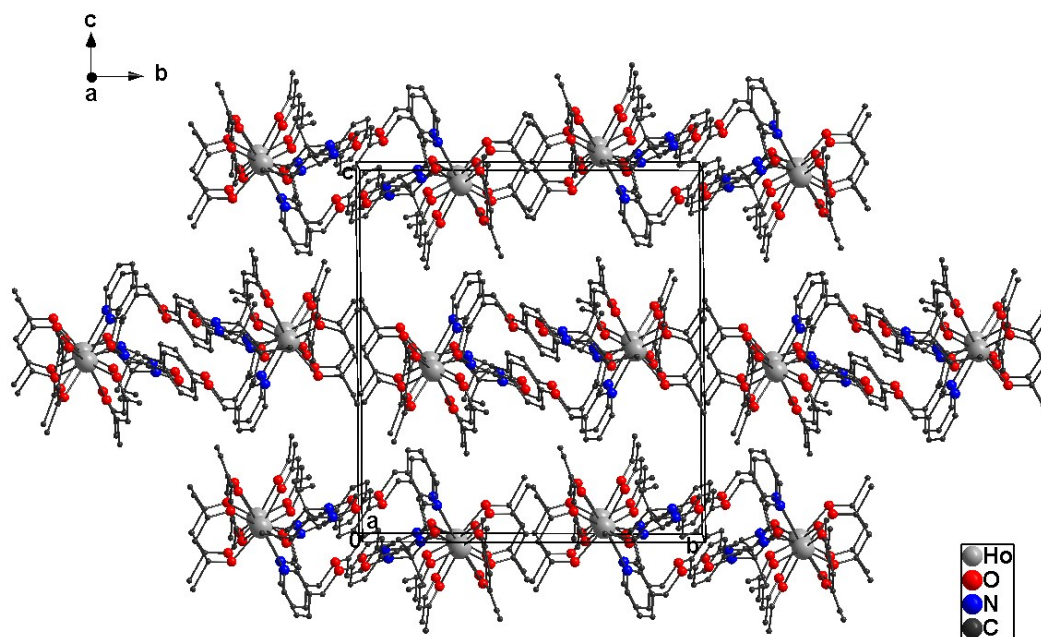

**Figure S7.** Packing diagram of complex 4, hydrogen and fluorin atoms are not shown for the sake of clarity.

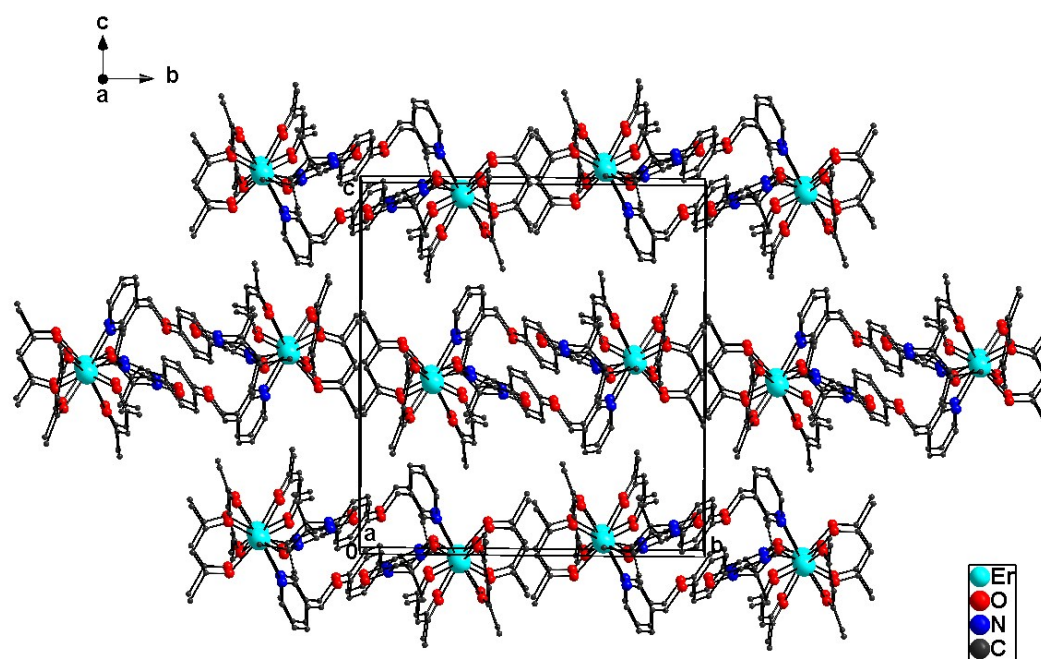

**Figure S8.** Packing diagram of complex 5, hydrogen and fluorin atoms are not shown for the sake of clarity.



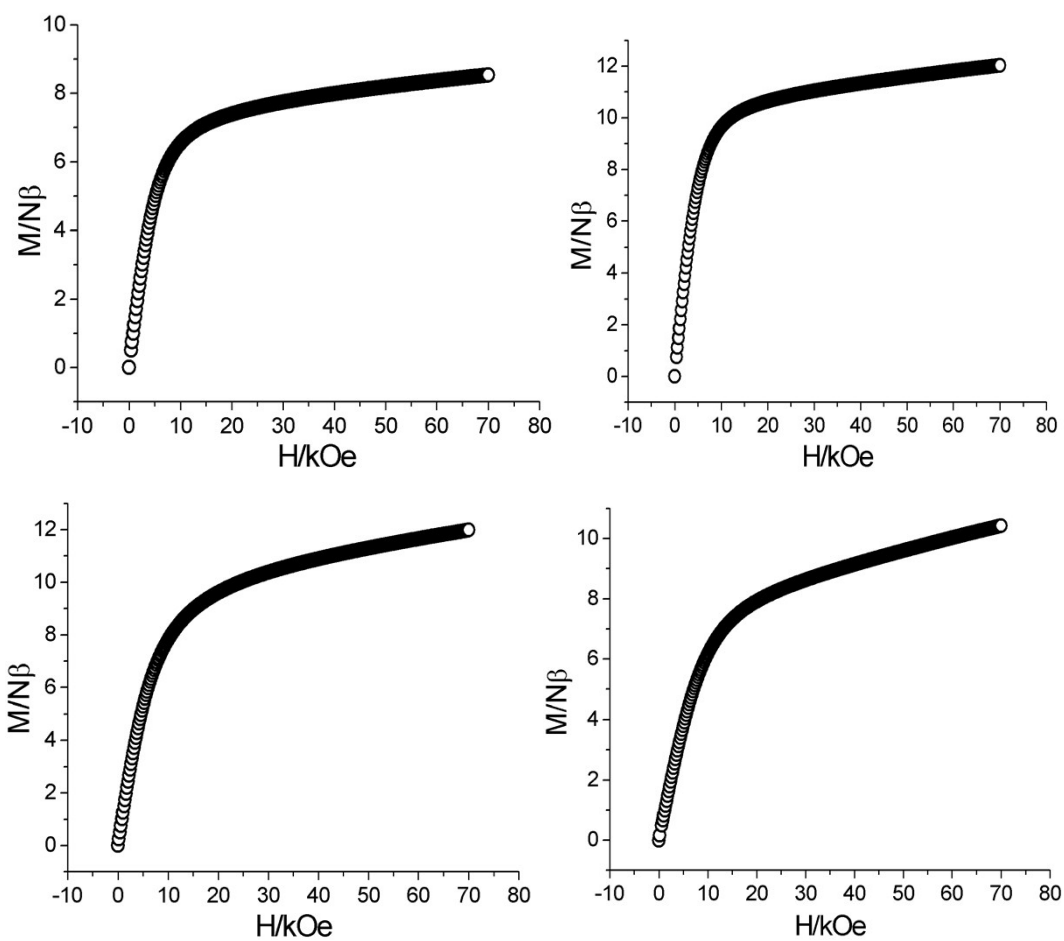

**Figure S9.**  $M$  versus  $H$  plot at 2 K for complex **2**(top left), **3**(top right), **4**(bottom left), and **5**(bottom right).

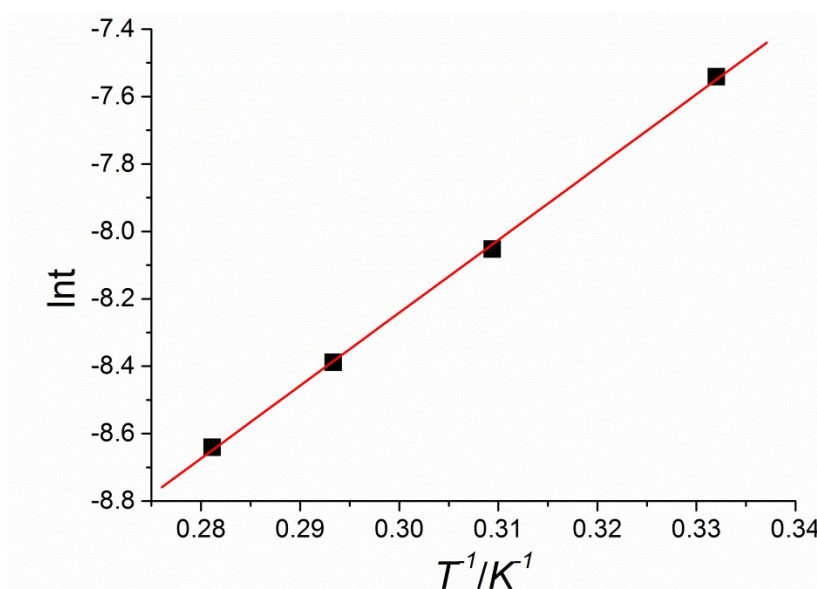

**Figure S10** Plots of  $\ln\tau$  versus  $T^{-1}$  fitting to the Arrhenius law for complex **2**.

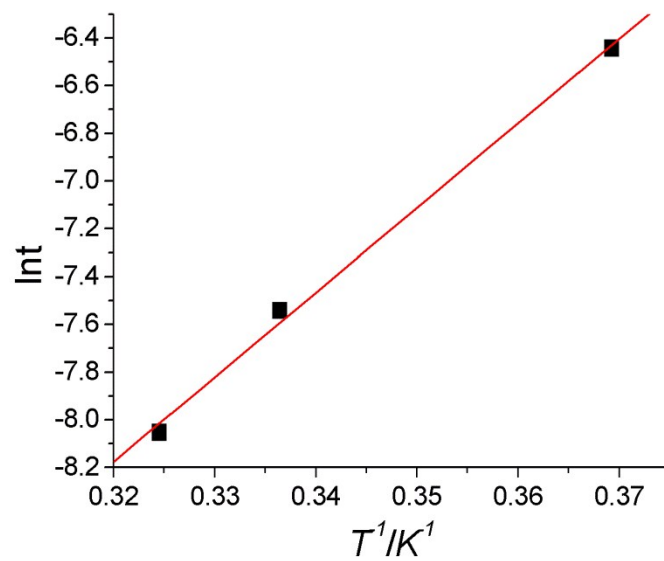

**Figure S11** Plots of  $\ln\tau$  versus  $T^{-1}$  fitting to the Arrhenius law for complex **3**.
